# Supplementary material for: One-step synthesis of water-soluble fluorescent copper nanoparticles for label-free detection of manganese ions
Source: Royal Society of Chemistry journal article supplement (doi:10.1039/c5ay01567g), 2015-01-01
Supplement: c5ay01567g1.pdf [file c5ay01567g1.pdf]

**Supporting information**

**One-step synthesis of water-soluble fluorescent copper nanoparticles for  
label-free detection of manganese ion**

Shi-Yuan Ma and Yi-Chun Yeh\*

Department of chemistry, National Taiwan Normal University

## Materials and Methods

### Chemicals

Histidine, asparagine, aspartic acid, cysteine, glycine, proline, serine, tryptophan, and tyrosine were obtained from Acros Organics. 2-mercaptoacetic acid (MA), 3-mercaptopropionic acid (MPA), 4-mercaptopbutyric acid (4MBA), 6-mercaptophexanoic acid (6MHA), 8-mercaptooctanoic acid (8MOA), and quinine sulfate were obtained from Sigma-Aldrich.  $\text{CuSO}_4$ , LiI, NaCl,  $\text{Ca}(\text{NO}_3)_2 \cdot 4\text{H}_2\text{O}$ ,  $\text{CrCl}_3 \cdot 6\text{H}_2\text{O}$ ,  $\text{MnCl}_2 \cdot 4\text{H}_2\text{O}$ ,  $\text{Fe}(\text{NO}_3)_3 \cdot 9\text{H}_2\text{O}$ ,  $\text{CoCl}_2 \cdot 6\text{H}_2\text{O}$ ,  $\text{NiSO}_4 \cdot 6\text{H}_2\text{O}$ ,  $\text{Na}_2\text{PdCl}_4$ ,  $\text{PtCl}_2$ ,  $\text{CdCl}_2 \cdot 2\frac{1}{2}\text{H}_2\text{O}$ ,  $\text{Hg}(\text{NO}_3)_2 \cdot \text{H}_2\text{O}$  and  $\text{PbCl}_2$  were purchased from Acros Organics. KCl and  $\text{MgCl}_2 \cdot 6\text{H}_2\text{O}$  were purchased from Merck. All chemicals and solvents were analytical grade and used as-received without further purification. Ultrapure water (18.3M $\Omega$ ) was purified through a Millipore system and employed for all experiments.

### Apparatus

The fluorescence spectra were measured by a fluorescence spectrometer (AMINCO-Bowman, Series 2). Absorption spectra were measured by UV-vis spectroscopy (Hewlett-Packard, 8453). Absorption and emission measurements were conducted in 1 cm  $\times$  1 cm quartz cuvettes. The morphology and size of Cu nanoparticles were taken by high-resolution transmission electron microscopy (FEI, TECNAI G2) including EDS Spectroscopy, CCD Camera with Diffpack program. X-ray photoelectron spectra (XPS) were recorded on an X-ray photoelectron spectrometer (ULVAC-PHI, PHI Quantera SXM). Lifetime was measured by a self-assembled time-resolved laser spectrometer. The laser which was used in this experiment is Pulsed Q-switched Nd:YAG. The third harmonic of the laser (355 nm, FWHM = 10 ns) was used as excitation source. After excited, the signal emitted by sample was filtered by monochromator (Acton Research Corporation SpectraPro-2150i). Then, the output was received by PMT (Hamamtsu model R928), digitized by a digitizer (LeCroy 9350A). And the collected data was fit by ns KinFit 4.0.1.

### Preparation and purification of Cu nanoparticles

All glassware was washed with *aqua regia*, and rinsed with ultrapure water. In a typical experiment, an aqueous solution of  $\text{CuSO}_4$  (90  $\mu\text{L}$ , 50 mM) was added into a mixture solution of histidine (7.5 mL, 258 mM) and MPA (3 mL, 10 mM). The mixture was vortexed, and allowed to react without stirring for 48 h at 28  $^\circ\text{C}$ . After the reaction has completed, the mixture was filtered with 0.22  $\mu\text{m}$  filter membrane to remove the large aggregates. Lastly, the solution was purified by dialysis through a

semipermeable membrane (with 1000 MWCO) for 16 h to remove unreacted histidine, copper salts, and MPA. The final solution was stored at 4 °C.

### **Quantum yield measurement**

The relative quantum yield (QY) of Cu nanoparticles was measured using a reference compound quinine sulfate (dissolved in 0.1 M H<sub>2</sub>SO<sub>4</sub>). The formula below is used to calculate QY.

$$QY = \frac{I}{I_R} \times \frac{A_R}{A} \times \frac{\eta^2}{\eta_R^2} \times QY_R$$

Where QY is the abbreviation of quantum yield, I represents the integral area under the fluorescence spectrum, A is the absorbance of Cu nanoparticles aqueous solution at the excitation wavelength, and  $\eta$  is the refractive index of the solution. The subscript R represents the reference.

### **Detection of Mn<sup>2+</sup> ions using fluorescent Cu nanoparticles**

The as-prepared Cu nanoparticle solution (52 mg/mL) was mixed with various concentrations (0.25  $\mu$ M to 250  $\mu$ M) of manganese chloride. Next, the mixture was incubated in a water bath at 55 °C for 2 h. The fluorescence of the mixture was measured and recorded ( $\lambda_{ex}$ = 350 nm;  $\lambda_{em, max}$ = 449 nm). Li<sup>+</sup>, Na<sup>+</sup>, K<sup>+</sup>, Ca<sup>2+</sup>, Mg<sup>2+</sup>, Cr<sup>3+</sup>, Mn<sup>2+</sup>, Fe<sup>3+</sup>, Co<sup>2+</sup>, Ni<sup>2+</sup>, Pd<sup>2+</sup>, Pt<sup>2+</sup>, Cd<sup>2+</sup>, Hg<sup>2+</sup>, Pb<sup>2+</sup> were investigated, respectively.

### **Effects of pH**

The Britton-Robinson (BR) buffers of various pH levels were mixed with the as-prepared Cu nanoparticles aqueous solutions. After vortexed, the mixture was incubated at room temperature for one day. Then, the fluorescence spectra were obtained and recorded by the fluorescence spectroscopy.

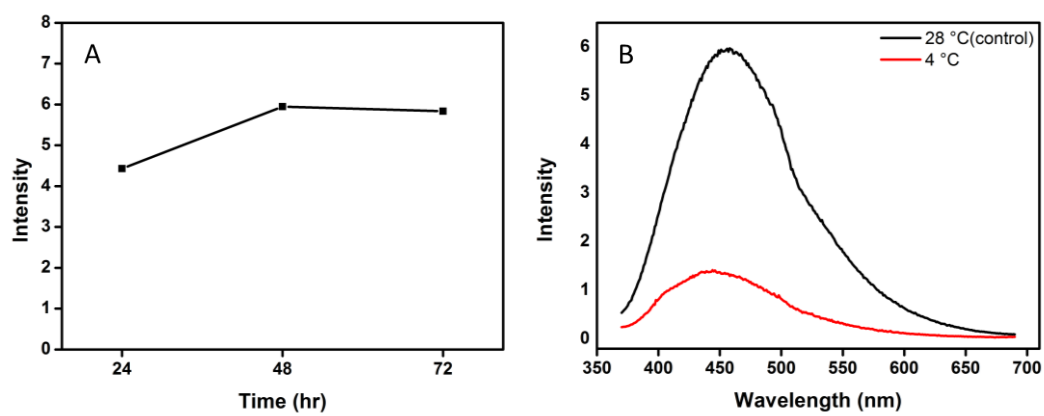

**Fig. S1** The effect of (A) reaction time and (B) reaction temperature on the intensity of fluorescence. The fluorescence intensity was collected at 449 nm.

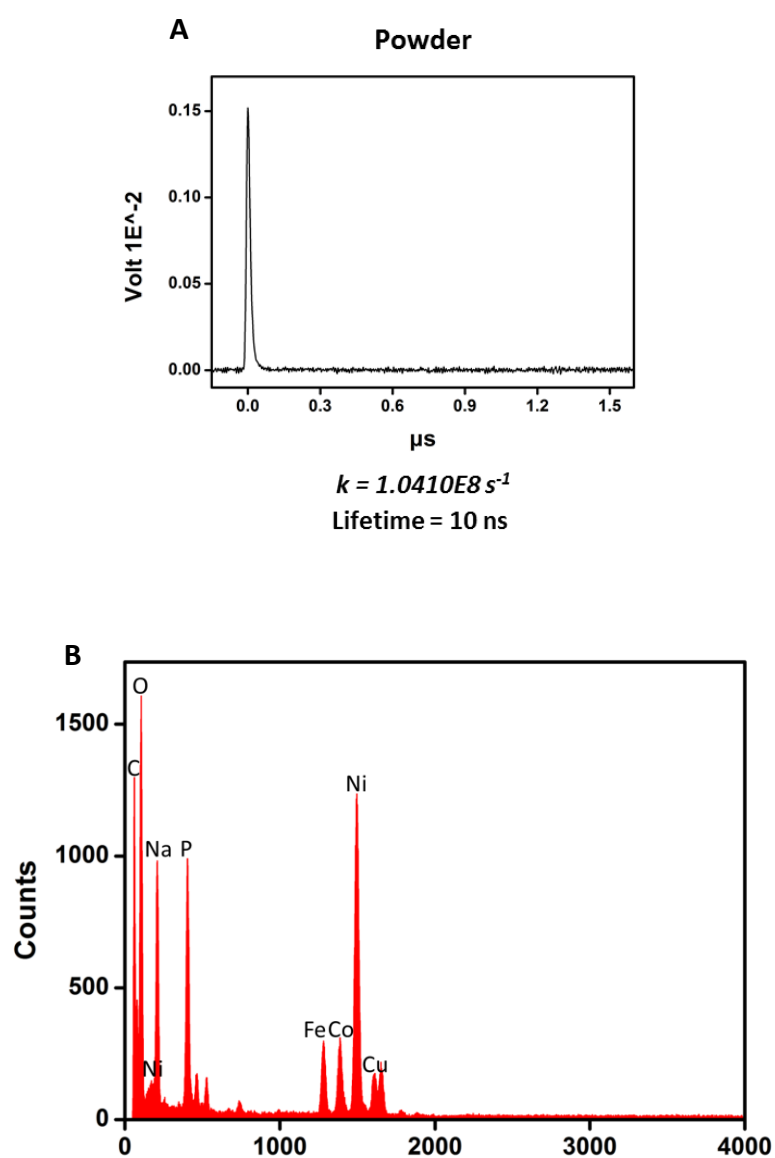

**Fig. S2** (A) Fluorescence decay of the lyophilized powder of Cu nanoparticles (black line). (B) Energy-dispersive X-ray spectroscopy (EDS) of resulting Cu nanoparticle solution (Ni signals come from the nickel grid, and Fe and Co signals come from the background of the instrument.)

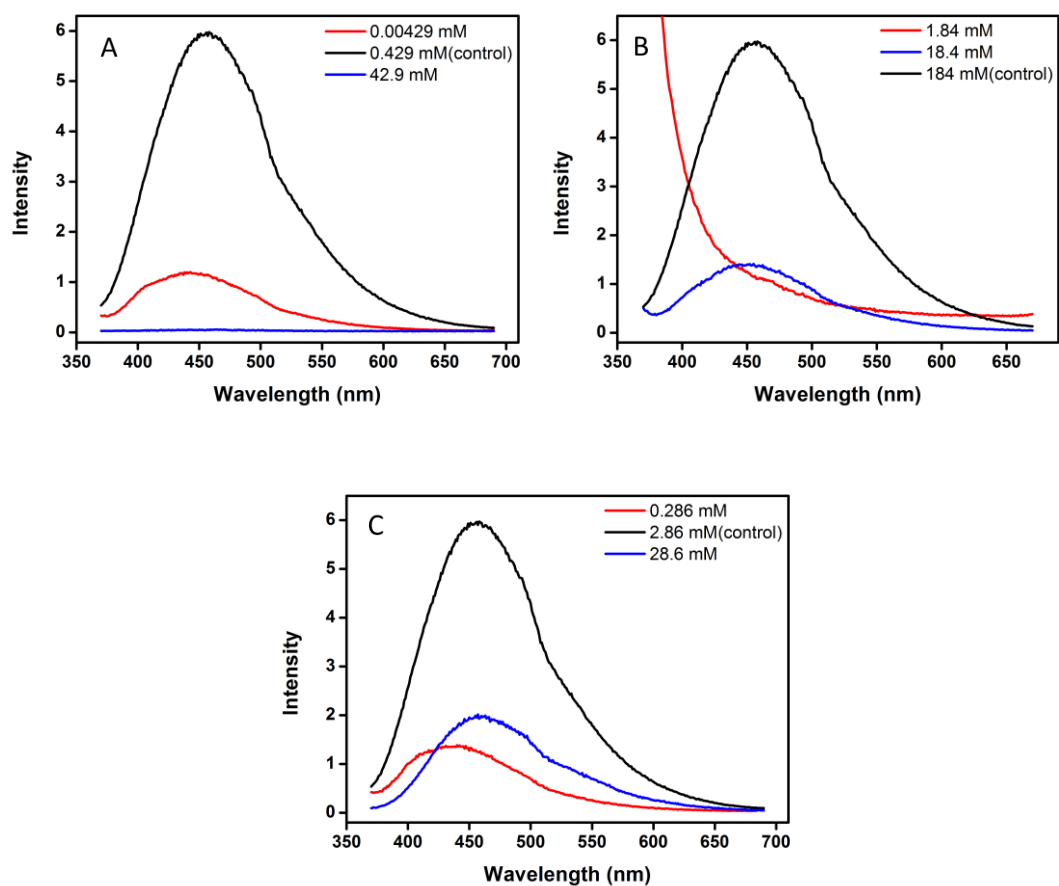

**Fig. S3** The final fluorescence intensity of solutions containing different molar ratios of (A) Cu<sup>2+</sup>, (B) histidine, and (C) MPA.

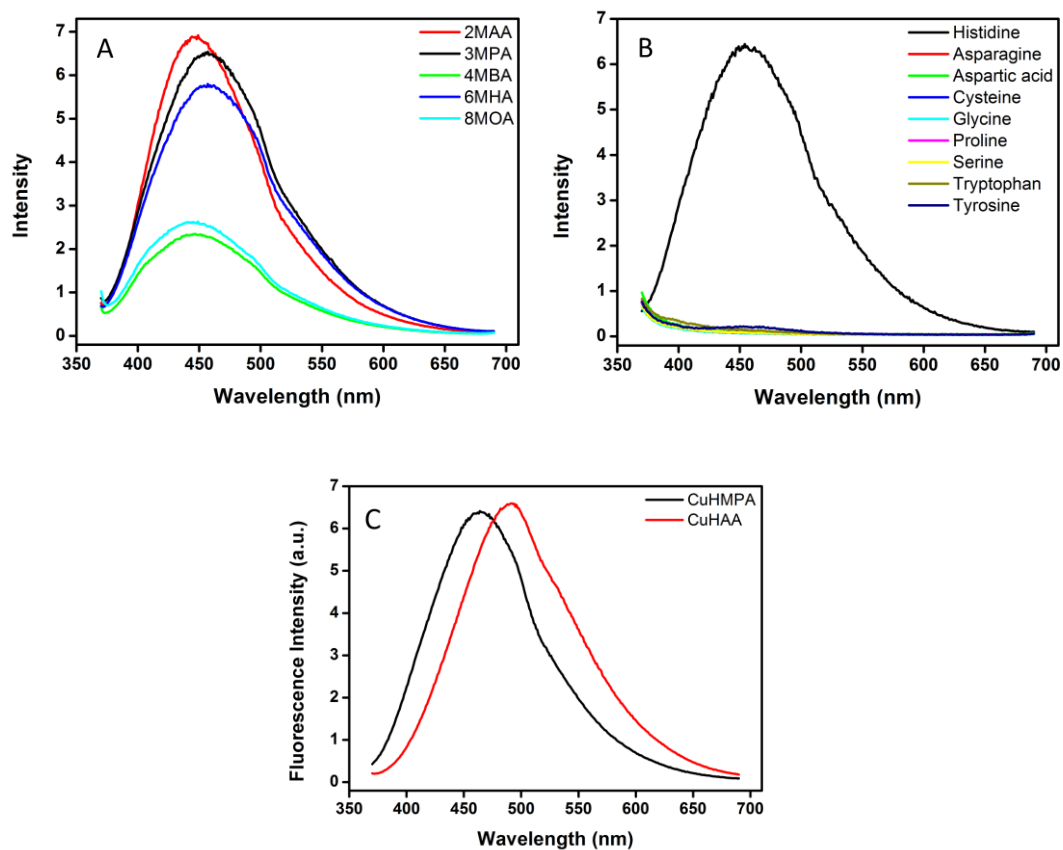

**Fig. S4** (A) The effect of chain lengths on the final fluorescence intensity. (B) A variety of amino acids were used as a substitute for histidine in the synthesis of Cu nanoparticles. (C) Ascorbic acid was used as reducing agent in the synthesis of Cu nanoparticles.

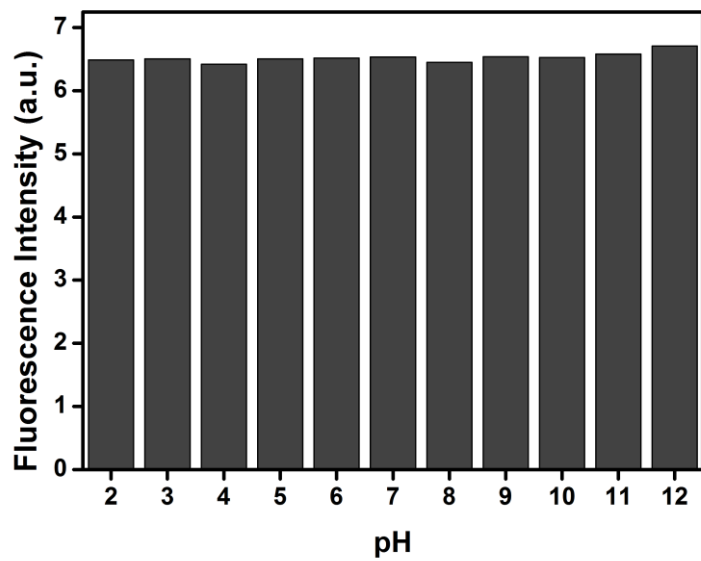

**Fig. S5** The final fluorescence intensity of Cu nanoparticles at different pH values.
